# Supplementary material for: Reliability, Validity, and Feasibility of the Frail-VIG Index
Source: MDPI journal article supplement (doi:10.3390/ijerph18105187), 2021-05-13
Supplement: s1 [file s1]

# Reliability, Validity and Feasibility of the Frail-VIG Index

## Supplementary File 1

**Table S1.** Missing variables in the different follow-up cut-offs.

|           |         | N     | %    |
|-----------|---------|-------|------|
| Baseline  | No miss | 11594 | 0.00 |
|           | Miss    | 0     |      |
| Admission | No miss | 11594 | 0.00 |
|           | Miss    | 0     |      |
| Discharge | No miss | 8592  | 0.12 |
|           | Miss    | 10    |      |
| Month 1   | No miss | 7061  | 0.01 |
|           | Miss    | 1     |      |
| Month 6   | No miss | 3908  | 1.31 |
|           | Miss    | 52    |      |
| Month 9   | No miss | 4247  | 1.51 |
|           | Miss    | 65    |      |
| Month 12  | No miss | 2840  | 1.46 |
|           | Miss    | 42    |      |
| TOTAL     | No miss | 49836 | 0.34 |
|           | Miss    | 170   |      |
